# Supplementary material
Source: ML conference proceedings conference paper supplement (https://openaccess.thecvf.com/content/CVPR2026/html/Hwang_LS-ViT_Least-Squares_Hessian_CVPR_2026_paper.html)
Supplement: Supplementary file 1 [file Hwang_LS-ViT_Least-Squares_Hessian_CVPR_2026_supplemental.pdf]

# LS-ViT: Least-Squares Hessian Based Block Reconstruction for Low-Bit Post-Training Quantization of Vision Transformers

## Supplementary Material

### A. Detailed Derivations

#### A.1. Derivation of Diagonal Least-Squares Hessian Approximation

For each index  $i$ , with  $N$  samples we have an overdetermined system. The LS objective is

$$\hat{H}_{i,i} = \operatorname{argmin}_{H_{i,i}} \sum_{n=1}^N (g_i^{(n)} - H_{i,i} \Delta z_i^{(n)})^2. \quad (23)$$

Differentiate w.r.t.  $H_{i,i}$  and set to zero:

$$\frac{\partial}{\partial H_{i,i}} \sum_{n=1}^N (g_i^{(n)} - H_{i,i} \Delta z_i^{(n)})^2 = 0, \quad (24)$$

$$-2 \sum_{n=1}^N (g_i^{(n)} - H_{i,i} \Delta z_i^{(n)}) \Delta z_i^{(n)} = 0. \quad (25)$$

Rearranging gives

$$\sum_{n=1}^N g_i^{(n)} \Delta z_i^{(n)} = H_{i,i} \sum_{n=1}^N (\Delta z_i^{(n)})^2, \quad (26)$$

hence

$$\hat{H}_{i,i} = \frac{\sum_{n=1}^N g_i^{(n)} \Delta z_i^{(n)}}{\sum_{n=1}^N (\Delta z_i^{(n)})^2} = \overline{g_i \Delta z_i} / \overline{(\Delta z_i)^2}. \quad (27)$$

The reconstruction loss follows as in Eq. (14).

#### A.2. Naive Rank-1 Least-Squares Solution

With  $\mathbf{H}^{(z)} = \mathbf{u}\mathbf{u}^\top$ ,

$$\mathbf{g}^{(n)} = \mathbf{u}\mathbf{u}^\top \Delta \mathbf{z}^{(n)}. \quad (28)$$

The gradient of  $\sum_{n=1}^N \|\mathbf{g}^{(n)} - \mathbf{u}\mathbf{u}^\top \Delta \mathbf{z}^{(n)}\|^2$  w.r.t.  $\mathbf{u}$  is

$$\begin{aligned} \nabla_{\mathbf{u}} \sum_{n=1}^N \|\mathbf{g}^{(n)} - \mathbf{u}\mathbf{u}^\top \Delta \mathbf{z}^{(n)}\|^2 \\ = -2 \sum_{n=1}^N \left( \mathbf{u}^\top \Delta \mathbf{z}^{(n)} \mathbf{I} + \Delta \mathbf{z}^{(n)} \mathbf{u}^\top \right) \left( \mathbf{g}^{(n)} - \mathbf{u}\mathbf{u}^\top \Delta \mathbf{z}^{(n)} \right) \\ = -2 \sum_{n=1}^N \left( \mathbf{u}^\top \Delta \mathbf{z}^{(n)} \mathbf{g}^{(n)} + \mathbf{u}^\top \mathbf{g}^{(n)} \Delta \mathbf{z}^{(n)} \right. \\ \left. - (\mathbf{u}^\top \Delta \mathbf{z}^{(n)})^2 \mathbf{u} - \|\mathbf{u}\|^2 (\mathbf{u}^\top \Delta \mathbf{z}^{(n)}) \Delta \mathbf{z}^{(n)} \right) \end{aligned} \quad (29)$$

Therefore, it is difficult to find a unique  $\mathbf{u}$  that satisfies the Equation (29) due to nonlinear and high-order terms of  $\mathbf{u}$ .

#### A.3. Derivation of Low-Rank Least-Squares Hessian Approximation

Multiplying Equation (16) by  $\Delta \mathbf{z}^{(n)\top}$  yields

$$\Delta \mathbf{z}^{(n)\top} \mathbf{g}^{(n)} = (\mathbf{u}^\top \Delta \mathbf{z}^{(n)})^2 \geq 0. \quad (30)$$

Since the pretrained full precision model is converged to a local minimum, we can assume the Hessian is positive-semidefinite (PSD) [13]:

$$\Delta \mathbf{z}^{(n)\top} \mathbf{H}^{(z)} \Delta \mathbf{z}^{(n)} \geq 0 \quad (31)$$

By Equation (6):

$$\Delta \mathbf{z}^{(n)\top} \mathbf{H}^{(z)} \Delta \mathbf{z}^{(n)} = \Delta \mathbf{z}^{(n)\top} \mathbf{g}^{(n)} = (\mathbf{u}^\top \Delta \mathbf{z}^{(n)})^2 \geq 0 \quad (32)$$

Since both vectors of  $\mathbf{u}$  and  $-\mathbf{u}$  define the same Hessian and thus the same reconstruction loss, we are free to choose the sign of  $\mathbf{u}$ :

$$\mathbf{H}^{(z)} = \mathbf{u}\mathbf{u}^\top = (-\mathbf{u})(-\mathbf{u})^\top \quad (33)$$

Without loss of generality, we can define  $\mathbf{u}$  such that its projection onto  $\Delta \mathbf{z}^{(n)}$  is non-negative, i.e.,

$$\mathbf{u}^\top \Delta \mathbf{z}^{(n)} \geq 0 \quad (34)$$

Equation (32) and (34) lead to the equation for each sample:

$$\mathbf{u}^\top \Delta \mathbf{z}^{(n)} = \sqrt{\Delta \mathbf{z}^{(n)\top} \mathbf{g}^{(n)}} \quad (35)$$

Therefore

$$\mathbf{g}^{(n)} = \mathbf{u} \sqrt{\Delta \mathbf{z}^{(n)\top} \mathbf{g}^{(n)}}. \quad (36)$$

The LS objective

$$\hat{\mathbf{u}} = \min_{\mathbf{u}} \sum_{n=1}^N \left\| \mathbf{g}^{(n)} - \mathbf{u} \sqrt{\Delta \mathbf{z}^{(n)\top} \mathbf{g}^{(n)}} \right\|^2 \quad (37)$$

has gradient

$$-2 \sum_{n=1}^N \sqrt{\Delta \mathbf{z}^{(n)\top} \mathbf{g}^{(n)}} \left( \mathbf{g}^{(n)} - \hat{\mathbf{u}} \sqrt{\Delta \mathbf{z}^{(n)\top} \mathbf{g}^{(n)}} \right) = \mathbf{0}, \quad (38)$$

which rearranges to

$$\sum_{n=1}^N \mathbf{g}^{(n)} \sqrt{\Delta \mathbf{z}^{(n)\top} \mathbf{g}^{(n)}} = \hat{\mathbf{u}} \sum_{n=1}^N \Delta \mathbf{z}^{(n)\top} \mathbf{g}^{(n)}. \quad (39)$$

Thus,

$$\hat{\mathbf{u}} = \frac{\sum_{n=1}^N \mathbf{g}^{(n)} \sqrt{\Delta \mathbf{z}^{(n)\top} \mathbf{g}^{(n)}}}{\sum_{n=1}^N \Delta \mathbf{z}^{(n)\top} \mathbf{g}^{(n)}}, \quad (40)$$

and substituting into  $\mathcal{L}_{\text{recon}} = \frac{1}{2} \Delta \mathbf{z}^\top \hat{\mathbf{u}} \hat{\mathbf{u}}^\top \Delta \mathbf{z}$  gives the expression reported in the main text.

Table 6. Ablation study of different Hessian approximation components on ImageNet. ‘Approx.’ denotes the approximation type: C (Constant, i.e., MSE), D (Diagonal), and L (Low-Rank). ‘FM.’ indicates the full-model computations for the approximation. We compare our diagonal (LS-ViT-D), low-rank (LS-ViT-L), and combined (LS-ViT) methods against various baselines. Best results are in **bold**.

| Method                 | Approx. | FM. | W/A   | ViT-S        | ViT-B        | DeiT-T       | DeiT-S       | DeiT-B       | Swin-S       | Swin-B       |
|------------------------|---------|-----|-------|--------------|--------------|--------------|--------------|--------------|--------------|--------------|
| Full-Prec              | -       | -   | 32/32 | 81.39        | 84.54        | 72.71        | 79.85        | 81.80        | 83.23        | 85.27        |
| MSE                    | C       | -   | 3/3   | 41.05        | 74.75        | 46.88        | 50.95        | 72.97        | 74.67        | 76.57        |
| BRECQ                  | D       | 1   | 3/3   | 54.33        | 66.62        | 49.27        | 63.72        | 72.82        | 75.20        | 77.64        |
| APH                    | D       | 2   | 3/3   | 59.11        | 76.05        | 53.82        | 67.40        | 75.89        | 75.44        | 77.31        |
| FIMA-Q-D               | D       | 1   | 3/3   | 60.02        | 76.29        | 55.54        | 68.68        | 76.32        | 75.08        | 77.87        |
| <b>LS-ViT-D (ours)</b> | D       | 1   | 3/3   | 63.25        | 77.35        | 55.55        | 69.30        | 76.55        | 77.29        | 79.03        |
| FIMA-Q-L               | L       | 15  | 3/3   | 64.09        | 77.46        | 55.25        | 68.91        | 76.33        | 76.03        | 77.59        |
| <b>LS-ViT-L (ours)</b> | L       | 1   | 3/3   | 63.96        | 77.47        | 55.46        | 69.20        | 76.34        | 77.28        | 79.28        |
| FIMA-Q                 | D+L     | 15  | 3/3   | 64.09        | 77.63        | 55.55        | 69.13        | 76.54        | 77.26        | 78.82        |
| <b>LS-ViT (ours)</b>   | D+L     | 1   | 3/3   | <b>64.10</b> | <b>77.65</b> | <b>55.72</b> | <b>69.41</b> | <b>76.57</b> | <b>77.39</b> | <b>79.40</b> |
| QDrop                  | C       | -   | 4/4   | 71.84        | 82.63        | 65.27        | 72.64        | 79.96        | 81.21        | 82.99        |
| BRECQ                  | D       | 1   | 4/4   | 73.88        | 81.47        | 65.26        | 74.76        | 78.82        | 81.25        | 82.80        |
| APH                    | D       | 2   | 4/4   | 75.63        | 82.10        | 66.25        | 76.23        | 80.14        | 81.40        | 83.11        |
| FIMA-Q-D               | D       | 1   | 4/4   | 75.88        | 83.02        | 66.81        | 76.79        | 80.19        | 81.18        | 83.35        |
| <b>LS-ViT-D (ours)</b> | D       | 1   | 4/4   | 76.25        | 83.05        | 67.05        | 76.67        | 80.34        | 81.79        | 83.45        |
| FIMA-Q-L               | L       | 15  | 4/4   | 76.47        | 83.04        | 66.78        | 76.66        | 80.30        | 81.60        | 83.15        |
| <b>LS-ViT-L (ours)</b> | L       | 1   | 4/4   | 76.62        | 83.08        | 66.94        | 76.67        | 80.40        | 81.80        | 83.62        |
| FIMA-Q                 | D+L     | 15  | 4/4   | 76.65        | 83.04        | 66.84        | 76.87        | 80.33        | <b>81.82</b> | 83.60        |
| <b>LS-ViT (ours)</b>   | D+L     | 1   | 4/4   | <b>76.67</b> | <b>83.08</b> | <b>67.05</b> | <b>76.89</b> | <b>80.41</b> | <b>81.82</b> | <b>83.62</b> |

## B. More Ablation Studies

### B.1. Analysis of Each Component

To validate the effectiveness of our proposed components, we conduct a detailed ablation study on the ImageNet dataset, with results presented in Table 6. We analyze the performance of our diagonal-only (LS-ViT-D) and low-rank-only (LS-ViT-L) approximations and compare them against other reconstruction metrics, particularly the components of FIMA-Q. First, our LS-ViT-D consistently outperforms all other methods based on diagonal Hessian approximation, including BRECQ, APH, and FIMA-Q-D, at both 3/3 and 4/4 bits. This result confirms the superiority of our least-squares formulation in capturing the diagonal Hessian information more accurately than prior approaches. Second, we compare the low-rank components. Notably, our LS-ViT-L, which uses only a rank-1 approximation (as shown in the ‘FM.’ column), achieves better performance than FIMA-Q-L, which relies on a much higher-cost rank-15 approximation. This highlights the high efficiency and accuracy of our proposed low-rank estimation, which effectively approximates the representative Hessian without resorting to higher ranks. Finally, LS-ViT, which combines the diagonal and low-rank approximations, achieves the best overall performance. This demonstrates that our two proposed components are complementary and synergistically contribute to the state-of-the-art results.

Table 7. Ablation results (%) w.r.t. the sample size with W2/A3 and W3/A3 on ImageNet.

|        | Sample | W2/A3 |        |        | W3/A3 |        |        |
|--------|--------|-------|--------|--------|-------|--------|--------|
|        |        | ViT-S | DeiT-S | Swin-S | ViT-S | DeiT-S | Swin-S |
| FIMA-Q | 128    | 14.59 | 38.85  | 40.01  | 49.64 | 64.12  | 71.71  |
|        | 256    | 22.88 | 44.81  | 47.68  | 56.02 | 66.21  | 74.12  |
|        | 512    | 30.91 | 48.11  | 54.12  | 60.45 | 67.87  | 75.80  |
|        | 1024   | 38.82 | 52.57  | 59.57  | 64.09 | 69.13  | 77.26  |
| LS-ViT | 128    | 16.75 | 39.25  | 47.97  | 50.26 | 64.42  | 72.29  |
|        | 256    | 26.18 | 45.28  | 56.26  | 56.83 | 66.45  | 74.62  |
|        | 512    | 35.00 | 49.74  | 61.41  | 61.25 | 68.01  | 76.16  |
|        | 1024   | 42.05 | 53.86  | 65.77  | 64.10 | 69.41  | 77.39  |

### B.2. Effect of Calibration Set Size

We investigate the impact of the calibration sample size on quantization performance, with results shown in Table 7. We compare LS-ViT against FIMA-Q using sample sizes from 128 to 1024 under challenging low-bit (W2/A3 and W3/A3) settings. As expected, the performance of both methods improves as more calibration samples are used, which allows for a more stable and accurate estimation of the Hessian statistics. However, our LS-ViT consistently outperforms FIMA-Q across all tested sample sizes and models. The performance gap is particularly significant in the extremely low-bit W2/A3 scenario. For example, on Swin-S, LS-ViT with only 256 samples achieves 56.26% accuracy, surpassing FIMA-Q with 512 samples (54.12%). This demonstrates that our least-squares Hessian provides

Table 8. Top-1 accuracy of various ViT-based models on ImageNet for the W4/A4 setting. “\*\*” denotes baselines differing only in the reconstruction metric; other settings are identical. “(-)” after APHQ-ViT shows results without MLP reconstruction for a metric-only comparison. **Bold** indicates the best top-1 accuracy.

| Method               | W/A   | ViT-S        | ViT-B        | DeiT-T       | DeiT-S       | DeiT-B       | Swin-S       | Swin-B       |
|----------------------|-------|--------------|--------------|--------------|--------------|--------------|--------------|--------------|
| Full-Prec            | 32/32 | 81.39        | 84.54        | 72.71        | 79.85        | 81.80        | 83.23        | 85.27        |
| PTQ4ViT [40]         | 4/4   | 42.57        | 30.69        | 36.96        | 34.08        | 64.39        | 76.09        | 74.02        |
| APQ-ViT [4]          | 4/4   | 47.95        | 41.41        | 47.94        | 43.55        | 67.48        | 77.15        | 76.48        |
| RepQ-ViT [15]        | 4/4   | 65.05        | 68.48        | 57.43        | 69.03        | 75.61        | 79.45        | 78.32        |
| ERQ [41]             | 4/4   | 68.91        | 76.63        | 60.29        | 72.56        | 78.23        | 80.74        | 82.44        |
| IGQ-ViT [26]         | 4/4   | 73.61        | 79.32        | 62.45        | 74.66        | 79.23        | 80.98        | 83.14        |
| GPTQ [7]             | 4/4   | 67.60        | 75.00        | 58.69        | 70.88        | 76.21        | 80.11        | 81.06        |
| DuQuant [17]         | 4/4   | 1.73         | 9.53         | 22.68        | 26.57        | 64.87        | 78.59        | 78.56        |
| SpinQuant [24]       | 4/4   | 50.41        | 5.42         | 42.57        | 58.44        | 60.67        | 64.16        | 50.80        |
| OmniQuant [29]       | 4/4   | 8.80         | 5.50         | 10.67        | 16.85        | 38.74        | 77.48        | 78.14        |
| SmoothQuant [37]     | 4/4   | 13.19        | 8.22         | 21.78        | 32.76        | 49.31        | 79.33        | 79.26        |
| I&S-ViT [42]         | 4/4   | 74.87        | 80.07        | 65.21        | 75.81        | 79.97        | 81.17        | 82.60        |
| DopQ-ViT [38]        | 4/4   | 75.69        | 80.95        | 65.54        | 75.84        | 80.13        | 81.71        | 83.34        |
| OASQ [25]            | 4/4   | 72.88        | 76.59        | 66.31        | 76.00        | 78.83        | 81.02        | 82.46        |
| QDrop* [32]          | 4/4   | 71.84        | 82.63        | 65.27        | 72.64        | 79.96        | 81.21        | 82.99        |
| BRECQ* [13]          | 4/4   | 73.88        | 81.47        | 65.26        | 74.76        | 78.82        | 81.25        | 82.80        |
| PD-Quant* [20]       | 4/4   | 74.48        | 82.54        | 66.95        | 76.62        | 80.18        | 81.64        | 83.47        |
| APHQ-ViT [36]        | 4/4   | 76.07        | 82.41        | 66.66        | 76.40        | 80.21        | 81.81        | 83.42        |
| APHQ-ViT(-)* [36]    | 4/4   | 75.63        | 82.10        | 66.25        | 76.23        | 80.14        | 81.40        | 83.11        |
| FIMA-Q* [35]         | 4/4   | 76.65        | 83.04        | 66.84        | 76.87        | 80.33        | <b>81.82</b> | 83.60        |
| <b>LS-ViT (ours)</b> | 4/4   | <b>76.67</b> | <b>83.08</b> | <b>67.05</b> | <b>76.89</b> | <b>80.41</b> | <b>81.82</b> | <b>83.62</b> |

a more robust and data-efficient approximation, achieving superior results even with a limited number of calibration samples.

### B.3. Extended W4/A4 Classification Results

As discussed in the main paper, we present a more comprehensive comparison of W4/A4 quantization results on ImageNet in Table 8. This table includes a wider array of recent SOTA methods, such as ERQ [41], DuQuant [17], SpinQuant [24], SmoothQuant [37], OmniQuant [29], and OASQ [25], providing a broader context for our performance. At the W4/A4 bit-width, the performance of SOTA methods is already highly optimized, making further improvements particularly challenging. As reported in FIMA-Q [35], increasing the computational budget (i.e., the rank) yields minimal gains at this bit-width. This suggests that the influence of the covariance term, which is critical in ultra-low-bit regimes, is comparatively less pronounced at 4-bit. Even in this context, LS-ViT still delivers consistent improvements. Compared to the strong FIMA-Q baseline, LS-ViT achieves an average accuracy improvement of 0.06%p across all seven models. This comprehensive comparison validates that LS-ViT is not only highly effective in ultra-low-bit scenarios (where the covariance term is crucial) but is also robustly effective in the W4/A4 setting, consistently

Table 9. Comparison with QAT under W3/A3 quantization.

| Model  | Method        | Type | Data Size | Training Time | Acc.  |
|--------|---------------|------|-----------|---------------|-------|
| DeiT-S | LSQ [6]       | QAT  | 1280K     | ~170 h        | 77.31 |
|        | QDrop [32]    | PTQ  | 1024      | 105 min       | 50.95 |
|        | FIMA-Q [35]   | PTQ  | 1024      | 225 min       | 69.13 |
|        | <b>LS-ViT</b> | PTQ  | 1024      | 105 min       | 69.41 |
| Swin-S | LSQ [6]       | QAT  | 1280K     | ~450 h        | 80.62 |
|        | QDrop [32]    | PTQ  | 1024      | 160 min       | 74.67 |
|        | FIMA-Q [35]   | PTQ  | 1024      | 420 min       | 77.26 |
|        | <b>LS-ViT</b> | PTQ  | 1024      | 165 min       | 77.39 |

outperforming the best prior work.

### B.4. Comparison with QAT

To evaluate the practical upper bound, Table 9 compares LS-ViT with the QAT-based LSQ [6] under the W3/A3 setting. While QAT relies on extensive fine-tuning over hundreds of hours, LS-ViT achieves 77.39% accuracy on Swin-S in just 165 minutes, narrowing the performance gap to 3.23%p with only 1024 calibration images. These results demonstrate that LS-ViT provides highly comparable accuracy while being 160× faster than QAT, proving its effectiveness for resource-constrained scenarios.
